# Supplementary material for: Modeling Hypoxia-Induced Neuropathies Using a Fast and Scalable Human Motor Neuron Differentiation System
Source: PubMed Central journal article supplement — Stem Cell Reports. 2020 May 7;14(6):1033–43. doi: 10.1016/j.stemcr.2020.04.003 (PMC7355142; doi:10.1016/j.stemcr.2020.04.003), 2020-05-07
Supplement: mmc1.pdf [file mmc1.pdf]

**Stem Cell Reports, Volume 14**

## **Supplemental Information**

### **Modeling Hypoxia-Induced Neuropathies Using a Fast and Scalable Human Motor Neuron Differentiation System**

**Laura I. Hudish, Andrew Bubak, Taylor M. Triolo, Christy S. Niemeyer, Lori Sussel, Maria Nagel, J. Matthew Taliaferro, and Holger A. Russ**

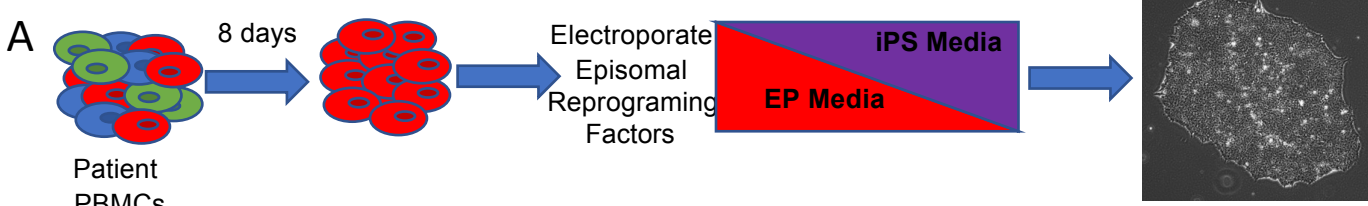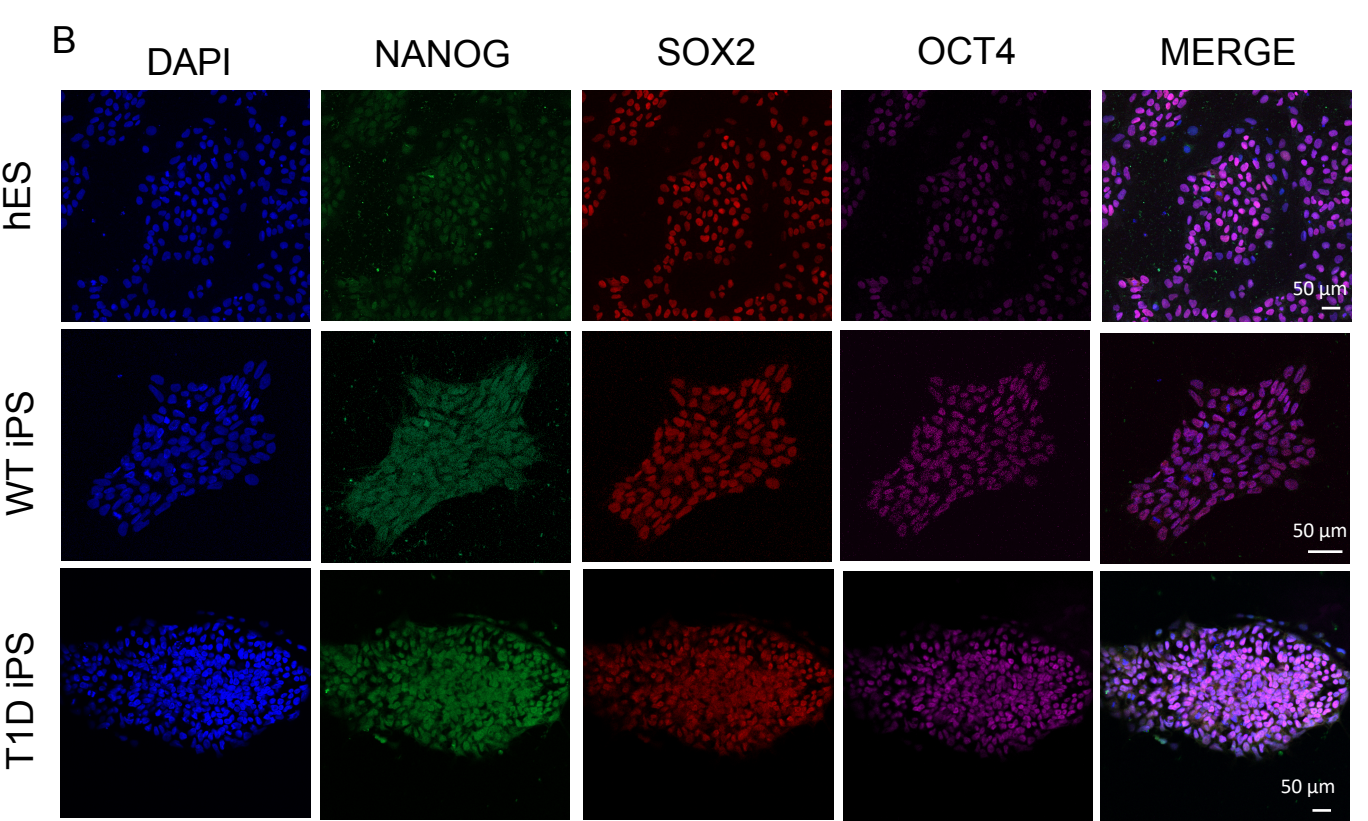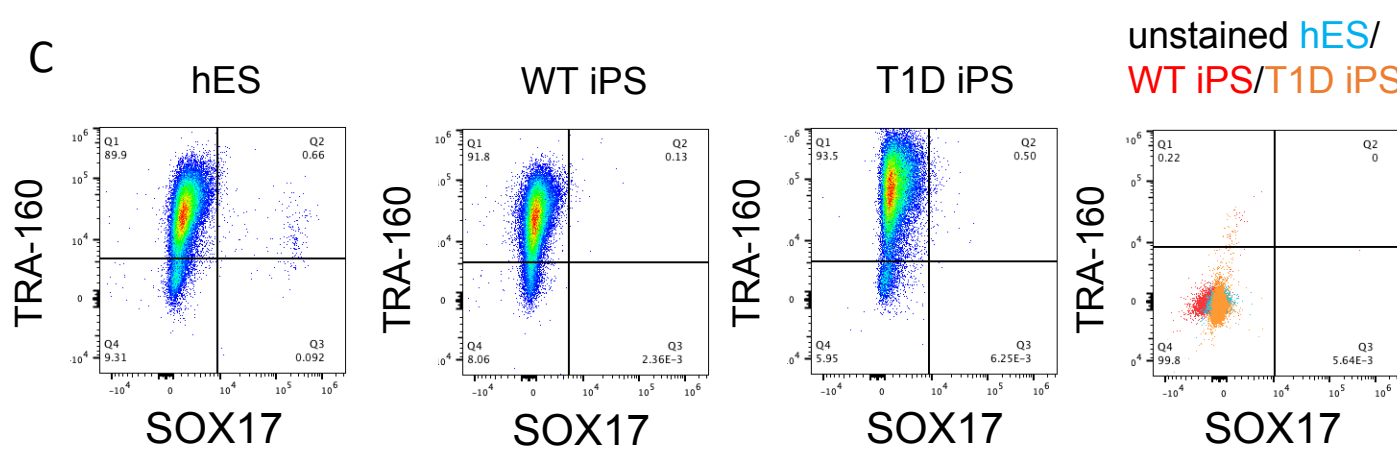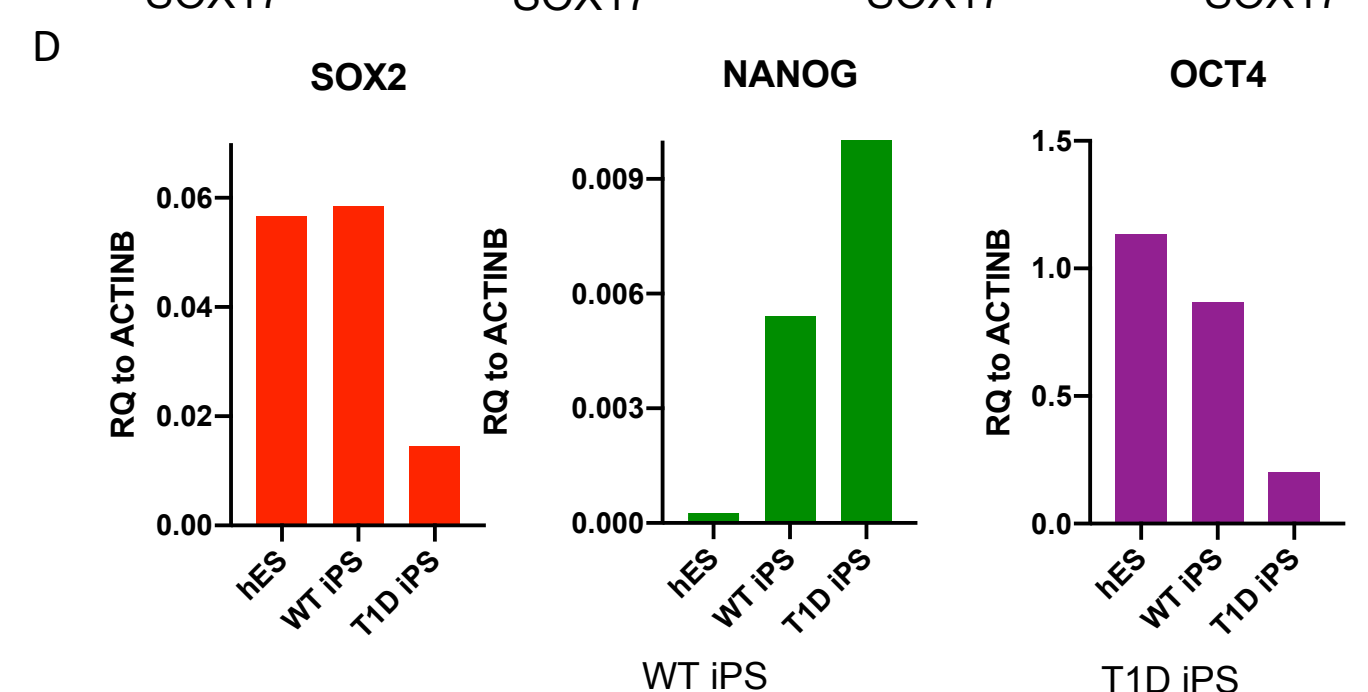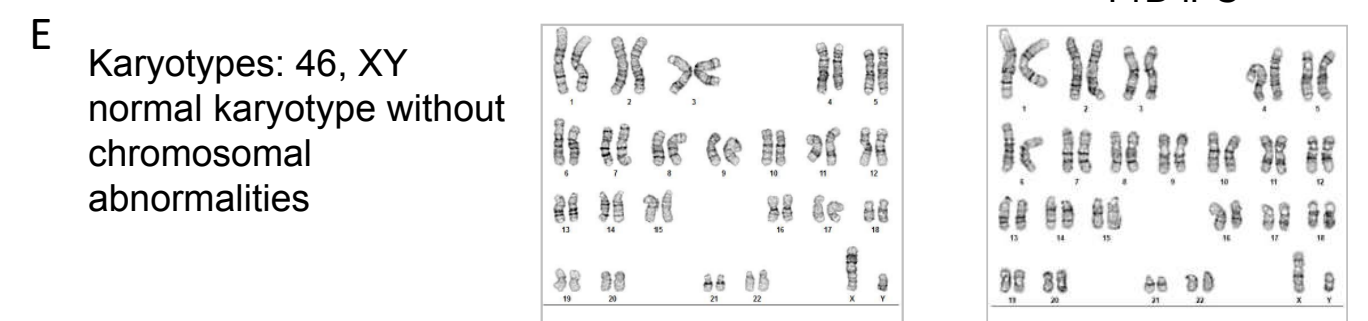

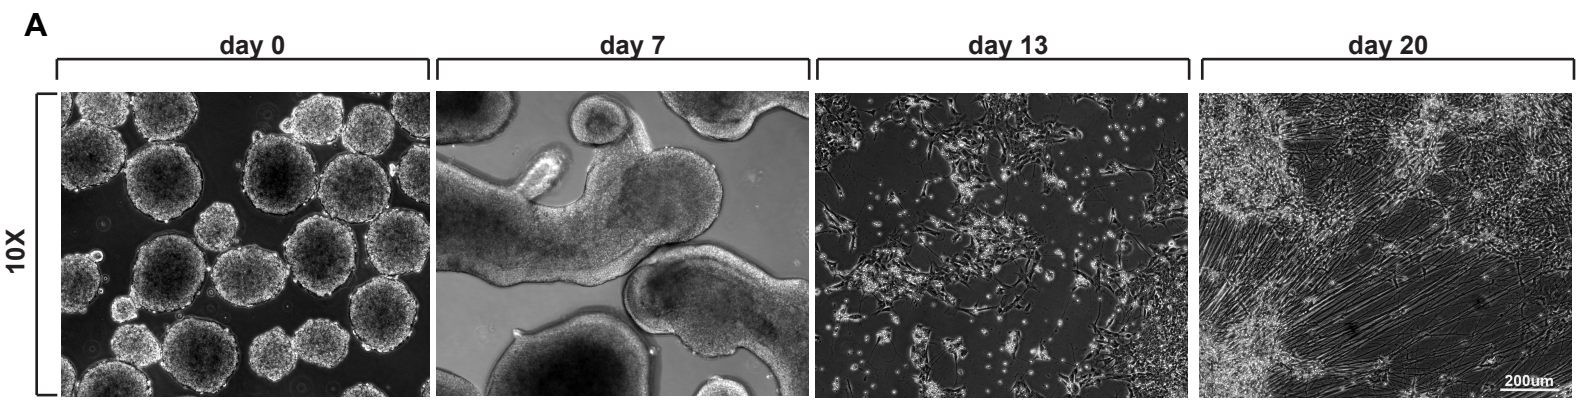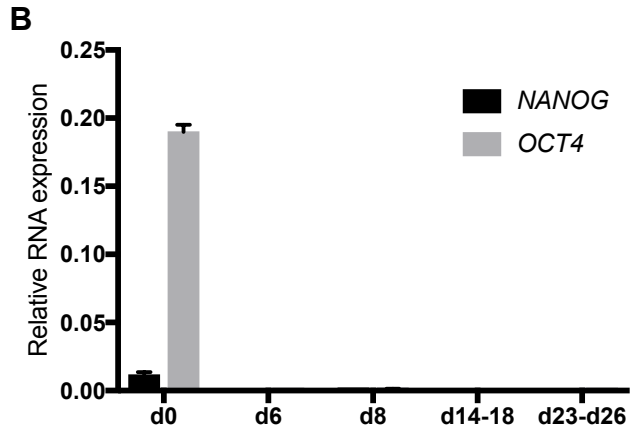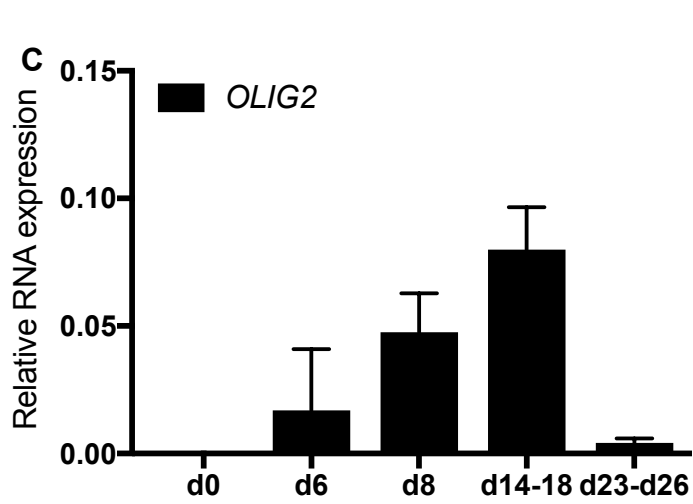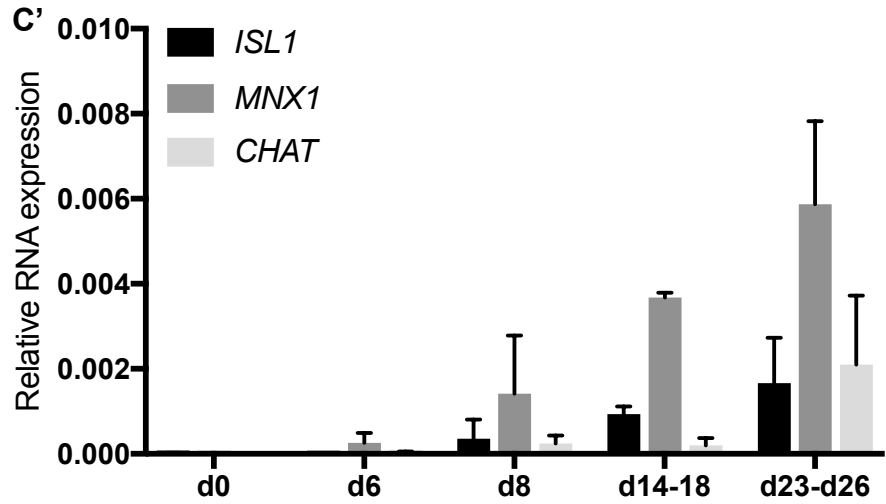

**D**      **ISL1/SMI32/DAPI**

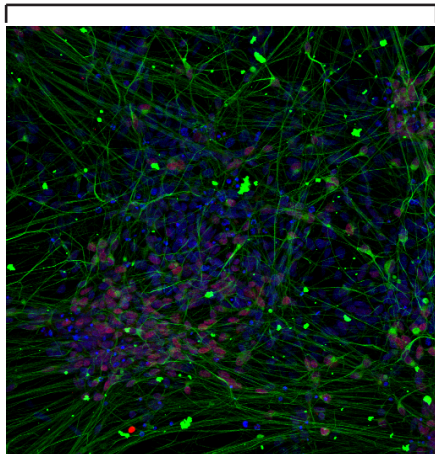

**E**      **βIII-TUBULIN/HB9/DAPI**

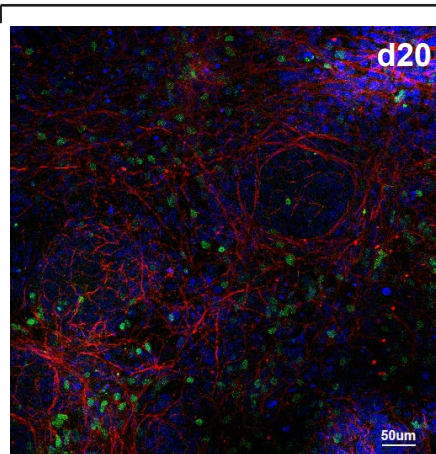

A

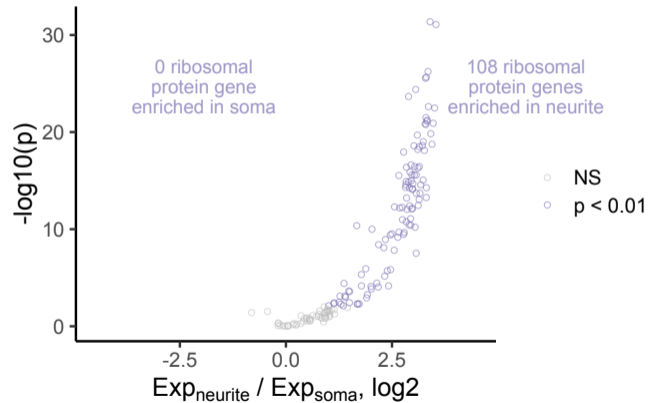

B

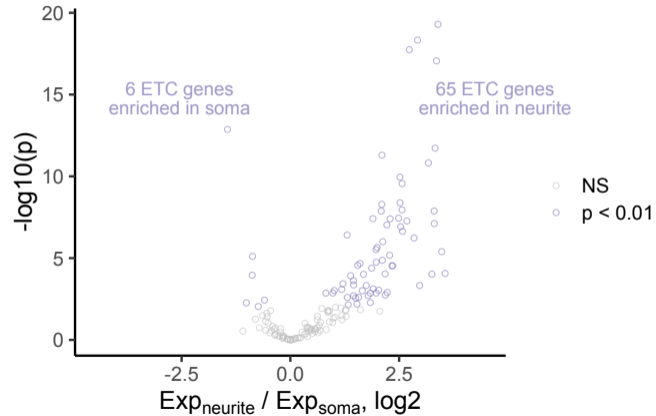

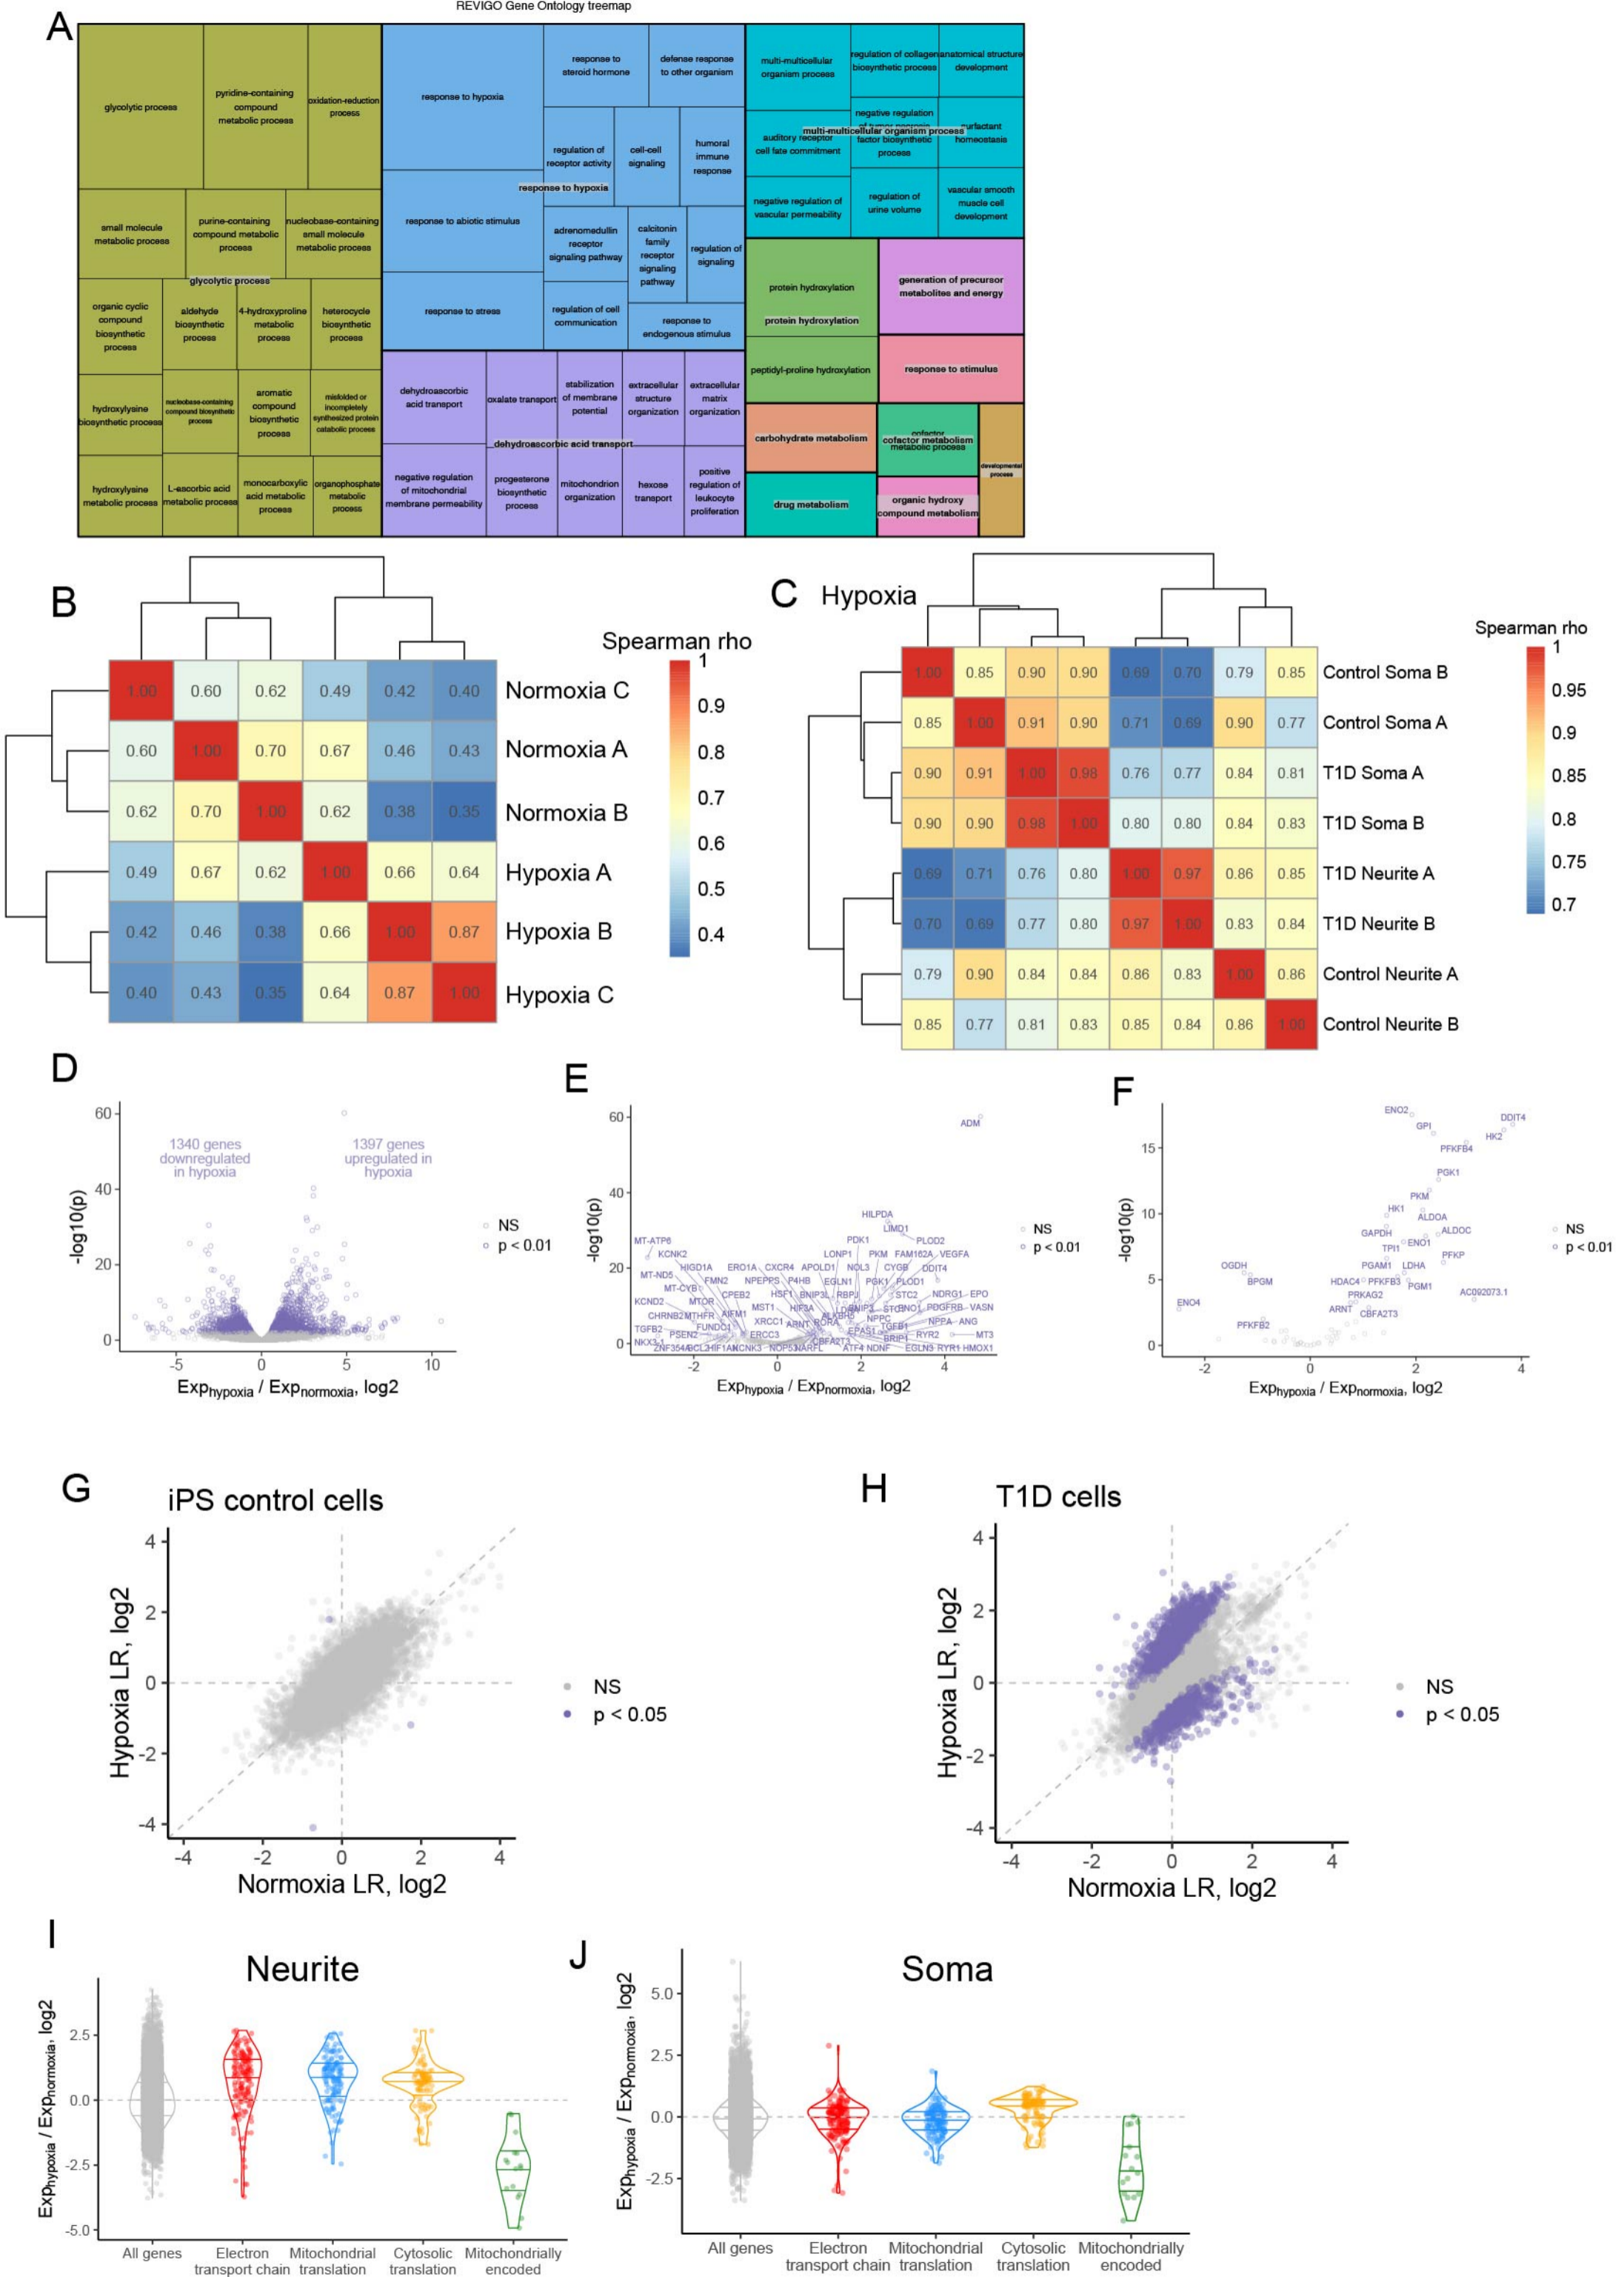

**Supplementary Figure 1: Generation of patient specific induced pluripotent stem cells (iPSCs).** (A) Schematic outlining the reprogramming approach and micrograph of emerging clonal, patient specific iPSC colony. (B) Immunofluorescence analysis of pluripotency markers NANOG, OCT4 and SOX2 in established iPSC and control hESC cells. (C) Flow based quantitative analysis for the pluripotency marker TRA1-60 and the endodermal marker gene SOX17 in iPSC and control hESC. (D) qPCR analysis for pluripotency markers *NANOG*, *OCT4* and *SOX2* of iPSC and control hESC n=1-3 independent experiments. (E) Established iPSCs exhibit a normal karyotype as assayed by G-Band karyotyping.

**Supplementary Figure 2. Suspension culture based direct differentiation approach of in-house reprogrammed, patient specific iPSCs into human motor neurons.** (A) Representative images taken at the indicated magnification at key stages of the differentiation protocol. Scale bar = 200um. (B) Quantitative PCR analysis of pluripotency markers *NANOG* and *OCT4* normalized to *TBP* at subsequent stages of differentiation. n=2 independent experiments, data is presented as SEM. (C) Quantitative PCR reveals expression of MN progenitor marker *OLIG2* peaks at d14 and becomes significantly reduced by d23. (C') Mature MN markers *ISL1* and *MNX1* expression is detectable at d14 and is maintained at d23, at which point

*CHAT* expression also becomes highly enriched. n=2 independent experiments, data is presented as SEM. (D) Immuno-fluorescence analysis for neuronal markers of d20 MNs, Scale bar = 50um.

### **Supplemental Figure 3: Quality control of soma / neurite fractionation.**

mRNAs that encode ribosomal proteins and components of the electron transport chain are enriched in neurites. (A) mRNAs that encode ribosomal proteins and electron transport chain components (B) are strongly enriched in neurite samples. Significantly enriched ( $p < 0.01$ ,  $\log_2$  fold change  $> 1.5$ ) genes are in purple. Both of these categories have been repeatedly seen as neurite-enriched in previous neuron fractionation studies, demonstrating the validity of these fractionations and samples.

### **Supplemental Figure 4. Changes in gene expression in response to hypoxia.**

Cellular responses to hypoxia at the level of RNA metabolism. (A) Gene ontology analysis of genes that were differentially expressed between normoxia and hypoxia conditions. Terms related to the response to hypoxia and glycolysis were the two most highly enriched categories. (B) Hierarchical clustering of LR values from normoxia and hypoxia- treated ES derived and (C) iPS control and T1D motor neurons. (D) LR values from normoxia and hypoxia-treated iPS control and (E) iPS T1D motor neurons. Genes with significant ( $p < 0.05$ ) changes in LR between conditions are colored in purple. (F) Differentially expressed genes between normoxia and hypoxia samples. Significantly differentially genes ( $p < 0.01$ ,  $\log_2$  fold change  $> 1.5$ ) are in purple. (G) Differentially expressed genes that contain the GO term “response to hypoxia”. (H) Differentially expressed genes that contain the GO term “glycolytic process”. (I, J) Gene expression differences between normoxia and hypoxia conditions in neurite (I) and soma (J) samples. In neurite samples, genes involved in the electron transport chain and mitochondrial translation are more expressed in hypoxia conditions relative to normoxia. However, in soma samples, there is no difference in expression. Genes involved in cytosolic translation are upregulated in response to hypoxia in both neurite and soma compartments. Mitochondrially-encoded genes are downregulated in both compartments, but the level of downregulation is greater in neurite than in soma.

**Supplemental Table 4**

| <b>Reagent</b>            | <b>Company</b>        | <b>Cat#</b> | <b>Final Concentration</b> |
|---------------------------|-----------------------|-------------|----------------------------|
| Knock Out DMEM F12        | Gibco                 | 12660012    |                            |
| Glutamax                  | Gibco                 | 35050061    | 1X                         |
| 2-Phospho-L-Ascorbic Acid | SIGMA-ALDRICH         | 49752       | 50mM                       |
| N2 Supplement A           | Stemcell technologies | 7152        | 1X                         |
| SM1 supplement            | Stemcell technologies | 5710        | 1X                         |
| SAG                       | Stemcell technologies | 73412       | 200nM                      |
| Dorsomorphin (Compound C) | Stemcell technologies | 72102       | 1uM                        |
| TTNPB                     | Stemcell technologies | 72892       | 1.5uM                      |
| BDNF                      | Stemcell technologies | 78005       | 0.02ug/mL                  |
| GDNF                      | Stemcell technologies | 78058       | 0.02ug/mL                  |
| CHIR99021                 | Stemcell technologies | 72052       | 4uM                        |
| SB431542                  | Stemcell technologies | 72232       | 10uM                       |
| γ-Secretase Inhibitor XX  | Calbiochem            | 565789      | 2uM                        |
| Rock Y-27632              | Selleck Chemical LLC  | S1049       | 5uM                        |

| <b>SYBR PRIMERS</b> |                                   |                                 |
|---------------------|-----------------------------------|---------------------------------|
| <b>Gene</b>         | <b>Forward</b>                    | <b>Reverse</b>                  |
| hTBP                | CCTGCCGATAACTATCTCTGGC            | GTTTCCACGGATGCTTTCTCG           |
| hHOXA1              | AAATCAGGACCACACAGAC               | GTAGCCCTCTCCAAC TTTC            |
| hHOXB3              | GGCAAACGTCCAAGCTGAA               | CTCCAGCTCCACCAGCTGCG            |
| hHOXC4              | GAGAGAGGTAGTGAGCGTCC              | CTGGCCCAGCTTTTCACAAT            |
| hHOXC5              | ACAGATTTACCCGTGGATGAC             | AGTGAGGTAGCGGTAAAGTG            |
| hHOXC6              | GAATGAGGGAAGACGAGAAAGAG           | CATAGGCGGTGGAATTGAGG            |
| hHOXC8              | TTTATGGGGCTCAGCAAGAGG             | TCCACTTCCTTCGGTTCTG             |
| hHOXC9              | AGCACAAAGAGGAGAAGGC               | CGTCTGGTACTTGGTGTAGG            |
| hHOXB8              | TAA GCG GCG AAT CGA GGT AT        | TGT TTC TCC AGC TCC TCC TG      |
| hHOXD8              | CCT GAC TGT AAA TCG TCC AGT GGT A | AGT TTG GAA GCG ACT GTA GGT TTG |
|                     |                                   |                                 |
| <b>Taqman probe</b> | <b>Biorad FAM</b>                 |                                 |
| NANOG               | CEP0050656                        |                                 |
| OCT4                | CEP0041056                        |                                 |
| ISL1                | CEP0049263                        |                                 |
| OLIG2               | CEP0025687                        |                                 |
| MNX1                | CEP0057720                        |                                 |
| CHAT                | CEP0049559                        |                                 |
| TBP                 | CIP0036255                        |                                 |
